# Supplementary material
Source: publisher site journal article supplement (https://www.dovepress.com/get_supplementary_file.php?f=265465.docx)
Supplement: Supplementary file 1 [file get_supplementary_file.php]

**Supplementary**

**Supplemental table**

Table S1. Characteristics of participants across sleep duration in males

Table S2. Characteristics of participants across sleep duration in females

Table S3. Characteristics of participants across sleep duration in northern region

Table S4. Characteristics of participants across sleep duration in southern region

**Table S1. Characteristics of participants across sleep duration in males**

|  | **≤ 6h**  **(n=372)** | **7h**  **(n=733)** | **8h**  **(n=1811)** | **≥ 9h**  **(n=885)** | **P Valuea** |
| --- | --- | --- | --- | --- | --- |
| **Age,** mean(SD), y | 55.6±14.2 | 50.9±14.1 | 48.2±14.3 | 50.4±16.8 | <0.0001 |
| **BMI** (kg/m2) | 23.4±3.4 | 23.6±3.4 | 23.4±3.3 | 23.1±3.4 | 0.0140 |
| **Rural region** (n, %) | 200(53.8%) | 449(61.3%) | 1267(70.0%) | 621(70.2%) | <0.0001 |
| **Educational attainment** | |  |  |  | <0.0001 |
| Low (n, %) | 274(73.7%) | 481(65.6%) | 1269(70.1%) | 688(77.7%) |
| Medium (n, %) | 71(19.1%) | 182(24.8%) | 415(22.9%) | 162(18.3%) |
| High (n, %) | 27(7.2%) | 70(9.6%) | 127(7.0%) | 35(4.0%) |
| **Household income per capita** | |  |  |  | <0.0001 |
| Low (n, %) | 17(5.0%) | 48(6.6%) | 157(8.7%) | 90(10.3%) |
| Medium (n, %) | 115(31.0%) | 223(30.6%) | 629(35.0%) | 326(37.3%) |
| High (n, %) | 236(64.0%) | 459(62.8%) | 1012(56.3%) | 459(52.4%) |
| **Geographical region** |  |  |  |  | <0.0001 |
| Northern region (n, %) | 170(45.7%) | 332(45.3%) | 793(43.8%) | 316(35.7%) |
| Southern region (n, %) | 202 (54.3%) | 401(54.7%) | 1018 (56.2%) | 569(64.3%) |
| **Total energy intake** (kcal/d) | 2270.1±697.8 | 2340.3±685.0 | 2357.8±650.9 | 2324.2±681.6 | <0.0001 |
| **Current smoker** (n, %) | 210(56.4%) | 395(53.9%) | 999(55.1%) | 475(53.7%) | 0.7556 |
| **Alcohol drinking** (n, %) | 236(63.4%) | 467(63.7%) | 1094(60.4%) | 497(56.2%) | 0.0095 |
| **Physical activity** |  |  |  |  | <0.0001 |
| Low (n, %) | 212(57.0%) | 373(50.9%) | 776(42.9%) | 406(45.9%) |
| Moderate (%) | 58(15.6%) | 134(18.3%) | 328(18.1%) | 128(14.5%) |
| High (n, %) | 102(27.4%) | 226(30.8%) | 707(39.0%) | 351(39.6%) |
| **Medical history** |  |  |  |  |  |
| Diabetes (n, %) | 13(3.5%) | 27(3.7%) | 54(3.0%) | 31(3.5%) | 0.7836 |
| Hypertension (%) | 65(17.5%) | 82(11.2%) | 187(10.3%) | 132(14.9%) | <0.0001 |
| MI (n, %) | 4(1.1%) | 12(1.6%) | 9(0.5%) | 13(1.5%) | 0.0221 |
| Stroke (n, %) | 11(3.0%) | 9(1.2%) | 28(1.6%) | 26(2.9%) | 0.0181 |
| **Blood pressure** |  |  |  |  |  |
| SBP (mmHg) | 128.9±18.5 | 126.7±17.0 | 125.0±16.4 | 126.8±19.3 | 0.0012 |
| DBP (mmHg) | 83.5±11.3 | 82.1±11.0 | 82.2±10.6 | 81.5±11.6 | 0.0107 |
| **Hs-CRP** (mg/L) | 1.78±1.95 | 1.76±1.89 | 1.60±1.70 | 1.74±1.88 | 0.4679 |
| **TG** (mmol/L) | 1.81±1.50 | 1.85±1.78 | 1.85±1.79 | 1.77±1.72 | 0.6997 |
| **LDL-C** (mmol/L) | 2.94±0.92 | 2.98±1.00 | 2.92±0.99 | 2.86±0.90 | 0.1011 |
| **HDL-C** (mmol/L) | 1.42±0.41 | 1.38±0.42 | 1.40±0.62 | 1.36±0.45 | 0.1189 |
| **UA** (μmol/L) | 356.1±99.4 | 355.5±123.6 | 358.1±108.1 | 355.2±119.2 | 0.6794 |
| **Glucose** (mmol/L) | 5.51±1.62 | 5.42±1.42 | 5.38±1.53 | 5.43±1.63 | 0.0209 |
| **Insulin** (uIU/mL) | 16.52±40.07 | 14.19±21.60 | 14.09±15.53 | 15.62±29.44 | 0.7199 |

**Note:** Data are expressed as the mean ± SD or as number (percentage).

Abbreviations: BMI, body mass index; MI, Myocardial infarction; SBP, systolic blood pressure; DBP, diastolic blood pressure; hs-CRP, high sensitive C-reactive protein; TG, triglycerides; LDL-C, low density lipoprotein cholesterol; HDL-C, high density lipoprotein cholesterol; UA, Uric acid. Glucose: Fasting serum glucose. Insulin: Fasting serum insulin.

a P value represents the significance of difference across sleep duration categories. P values were determined by one-way analysis of variance or Kruskal-Wallis test for continuous variables and Pearson χ2 statistic for categorical variables.

**Table S2. Characteristics of participants across sleep duration in females**

|  | **≤ 6h**  **(n=459)** | **7h**  **(n=842)** | **8h**  **(n=2082)** | **≥ 9h**  **(n=986)** | **P Valuea** |
| --- | --- | --- | --- | --- | --- |
| **Age** (years) | 58.3±13.7 | 51.9±13.5 | 47.5±13.9 | 50.3±17.2 | <0.0001 |
| **BMI** (kg/m2) | 23.7±3.6 | 23.6±3.5 | 23.4±3.5 | 23.1±3.4 | 0.0178 |
| **Rural region** (n, %) | 261(56.9%) | 509(60.5%) | 1432(68.8%) | 706(71.6%) | <0.0001 |
| **Educational attainment** | |  |  |  | <0.0001 |
| Low (n, %) | 381(83.0%) | 637(75.6%) | 1602(76.9%) | 863(87.5%) |
| Medium (n, %) | 72(15.7%) | 166(19.7%) | 380(18.3%) | 104(10.5%) |
| High (n, %) | 6(1.3%) | 39(4.7%) | 100(4.8%) | 19(1.9%) |
| **Household income per capita** | |  |  |  | <0.0001 |
| Low (n, %) | 38(8.4%) | 69(8.3%) | 202(9.8%) | 121(12.5%) |
| Medium (n, %) | 160(35.4%) | 268(32.3%) | 725(35.2%) | 388(40.0%) |
| High (n, %) | 254(56.2%) | 493(59.4%) | 1135(55.0%) | 460(47.5%) |
| **Geographical region** |  |  |  |  | <0.0001 |
| Northern region (n, %) | 236(51.4%) | 370(43.9%) | 899(43.2%) | 371(37.6%) |
| Southern region (n, %) | 223(48.6%) | 472(56.1%) | 1183(56.8%) | 615(62.4%) |
| **Total energy intake** (kcal/d) | 1836.6±673.5 | 1955.9±564.4 | 1993.0±594.7 | 1942.0±640.0 | <0.0001 |
| **Current smoker** (n, %) | 45(9.8%) | 26(3.1%) | 55(2.6%) | 31(3.1%) | <0.0001 |
| **Alcohol drinking** (n, %) | 49(10.7%) | 76(9.0%) | 186(8.9%) | 80(8.1%) | 0.4699 |
| **Physical activity** |  |  |  |  | <0.0001 |
| Low (n, %) | 316(68.9%) | 528(62.7%) | 1168(56.1%) | 557(56.5%) |
| Moderate (%) | 45(9.8%) | 110(13.1%) | 266(12.8%) | 110(11.2%) |
| High (n, %) | 98(21.4%) | 204(24.2%) | 648(31.1%) | 319(32.3%) |
| **Medical history** |  |  |  |  |  |
| Diabetes (n, %) | 22(4.8%) | 19(2.3%) | 38(1.8%) | 29(2.9%) | 0.0019 |
| Hypertension (%) | 105(22.9%) | 128(15.2%) | 218(10.5%) | 139(14.1%) | <0.0001 |
| MI (n, %) | 9(2.0%) | 8(1.0%) | 14(0.7%) | 9(0.9%) | 0.0753 |
| Stroke (n, %) | 6(1.3%) | 2(0.2%) | 11(0.5%) | 13(1.3%) | 0.0130 |
| **Blood pressure** |  |  |  |  |  |
| **SBP** (mmHg) | 131.9±22.5 | 124.9±20.4 | 121.3±18.7 | 122.7±20.4 | <0.0001 |
| **DBP** (mmHg) | 82.0±11.7 | 80.1±11.7 | 78.4±11.0 | 77.8±11.1 | <0.0001 |
| **Hs-CRP** (mg/L) | 1.83±1.84 | 1.65±1.86 | 1.51±1.77 | 1.73±1.93 | <0.0001 |
| **TG** (mmol/L) | 1.76±1.44 | 1.52±1.25 | 1.53±1.23 | 1.56±1.17 | 0.0006 |
| **LDL-C** (mmol/L) | 3.25±0.99 | 3.08±0.95 | 2.97±0.98 | 2.99±1.00 | <0.0001 |
| **HDL-C** (mmol/L) | 1.48±0.37 | 1.49±0.54 | 1.48±0.48 | 1.49±0.40 | 0.9815 |
| **UA** (μmol/L) | 284.4±85.3 | 264.6±76.7 | 262.1±78.6 | 265.4±80.2 | <0.0001 |
| **Glucose** (mmol/L) | 5.50±1.40 | 5.32±1.26 | 5.24±1.22 | 5.24±1.30 | <0.0001 |
| **Insulin** (uIU/mL) | 13.61±12.15 | 13.42±16.50 | 14.23±25.71 | 14.23±23.43 | 0.0470 |

**Note:** Data are expressed as the mean ± SD or as number (percentage).

Abbreviations: BMI, body mass index; MI, Myocardial infarction; SBP, systolic blood pressure; DBP, diastolic blood pressure; hs-CRP, high sensitive C-reactive protein; TG, triglycerides; LDL-C, low density lipoprotein cholesterol; HDL-C, high density lipoprotein cholesterol; UA, Uric acid. Glucose: Fasting serum glucose. Insulin: Fasting serum insulin.

a P value represents the significance of difference across sleep duration categories. P values were determined by one-way analysis of variance or Kruskal-Wallis test for continuous variables and Pearson χ2 statistic for categorical variables.

**Table S3. Characteristics of participants across sleep duration in the southern region**

|  | **≤ 6h**  **(n=372)** | **7h**  **(n=733)** | **8h**  **(n=1811)** | **≥ 9h**  **(n=885)** | **P Valuea** |
| --- | --- | --- | --- | --- | --- |
| **Age** (years) | 57.6±13.7 | 51.3±14.1 | 48.0±14.5 | 51.15±17.2 | <0.0001 |
| **Male** (n, %) | 202(47.5%) | 401(45.9%) | 1183(53.7%) | 1018(46.3%) | 0.7127 |
| **BMI** (kg/m2) | 23.2±3.7 | 23.1±3.4 | 22.8±3.2 | 22.6±3.3 | 0.0002 |
| **Rural region** (n, %) | 227(53.4%) | 527(60.4%) | 1483(67.4%) | 823(69.5%) | <0.0001 |
| **Educational attainment** | |  |  |  | <0.0001 |
| Low (n, %) | 324(76.2%) | 639(73.2%) | 1633(74.2%) | 980(82.8%) |
| Medium (n, %) | 80(18.8%) | 184(21.1%) | 459(20.8%) | 169(14.2%) |
| High (n, %) | 21(5.0%) | 50(5.7%) | 109(5.0%) | 35(3.0%) |
| **Household income per capita** | |  |  |  | <0.0001 |
| Low (n, %) | 25(6.0%) | 61(7.0%) | 202(9.3%) | 104(8.9%) |
| Medium (n, %) | 126(30.2%) | 293(33.9%) | 780(35.9%) | 467(40.1%) |
| High (n, %) | 266(63.8%) | 510(59.0%) | 1193(54.9%) | 593(50.9%) |
| **Total energy intake** (kcal/d) | 2056.7±791.5 | 2183.5±667.0 | 2203.4±678.2 | 2174.9±695.9 | <0.0001 |
| **Current smoker** (n, %) | 134(31.5%) | 243(5.2%) | 599(27.2%) | 322(27.2%) | 0.3173 |
| **Alcohol drinking** (n, %) | 165(38.8%) | 307(35.2%) | 688(31.3%) | 380(31.1%) | 0.0080 |
| **Physical activity** |  |  |  |  | <0.0001 |
| Low (n, %) | 261(61.4%) | 495(56.7%) | 1113(50.6%) | 626 (52.9%) |
| Moderate (%) | 61(14.4%) | 152(17.4%) | 372(16.9%) | 148(12.5%) |
| High (n, %) | 103(24.2%) | 226(25.9%) | 716(32.5%) | 410(34.6%) |
| **Medical history** |  |  |  |  |  |
| Diabetes (n, %) | 15(3.5%) | 26(3.0%) | 39(1.8%) | 30(2.5%) | 0.0586 |
| Hypertension (%) | 87(20.5%) | 132(15.1%) | 213(9.7%) | 162(13.7%) | <0.0001 |
| MI (n, %) | 5(1.2%) | 9(1.0%) | 9(0.4%) | 9(0.8%) | 0.1315 |
| Stroke (n, %) | 6(1.4%) | 4(0.5%) | 19(0.9%) | 21(1.7%) | 0.0185 |
| **Blood pressure** |  |  |  |  |  |
| SBP (mmHg) | 129.5±22.1 | 124.2±19.9 | 121.83±18.1 | 123.80±20.0 | <0.0001 |
| DBP (mmHg) | 80.3±11.4 | 79.2±11.3 | 78.3±10.8 | 78.18±11.1 | <0.0001 |
| **Hs-CRP** (mg/L) | 1.80±1.83 | 1.70±1.92 | 1.55±1.78 | 1.70±1.93 | 0.0038 |
| **TG** (mmol/L) | 1.73±1.36 | 1.61±1.33 | 1.62±1.34 | 1.66±1.46 | 0.0990 |
| **LDL-C** (mmol/L) | 2.98±0.93 | 3.00±0.93 | 2.89±0.93 | 2.90±0.93 | 0.0040 |
| **HDL-C** (mmol/L) | 1.47±0.38 | 1.45±0.56 | 1.45±0.44 | 1.43±0.38 | 0.2032 |
| **UA** (μmol/L) | 336.5±100.7 | 318.5±97.7 | 317.0±105.5 | 320.2±110.1 | 0.0012 |
| **Glucose** (mmol/L) | 5.35±1.23 | 5.28±1.25 | 5.18±1.21 | 5.23±1.37 | <0.0001 |
| **Insulin** (uIU/mL) | 14.79±33.3 | 13.25±19.58 | 13.77±22.26 | 13.85±24.14 | 0.5470 |

**Note:** Data are expressed as the mean ± SD or as number (percentage).

Abbreviations: BMI, body mass index; MI, Myocardial infarction; SBP, systolic blood pressure; DBP, diastolic blood pressure; hs-CRP, high sensitive C-reactive protein; TG, triglycerides; LDL-C, low density lipoprotein cholesterol; HDL-C, high density lipoprotein cholesterol; UA, Uric acid. Glucose: Fasting serum glucose. Insulin: Fasting serum insulin.

a P value represents the significance of difference across sleep duration categories. P values were determined by one-way analysis of variance or Kruskal-Wallis test for continuous variables and Pearson χ2 statistic for categorical variables.

**Table S4. Characteristics of participants across sleep duration in the northern region**

|  | **≤ 6h**  **(n=406)** | **7h**  **(n=702)** | **8h**  **(n=1692)** | **≥ 9h**  **(n=687)** | **P Valuea** |
| --- | --- | --- | --- | --- | --- |
| **Age** (years) | 56.6±14.3 | 51.6±13.3 | 47.6±13.5 | 49.3±16.5 | <0.0001 |
| **Male** (n, %) | 170(41.9%) | 332(47.3%) | 793(46.9%) | 316(56.0%) | 0.2943 |
| **BMI** (kg/m2) | 23.9±3.3 | 24.2±3.5 | 24.2±3.4 | 23.9±3.5* | 0.0002 |
| **Rural region** (n, %) | 234(57.6%) | 431(61.4%) | 1216(71.9%) | 504(73.4%) | <0.0001 |
| **Educational attainment** | |  |  |  | <0.0001 |
| Low (n, %) | 331(81.5%) | 479(68.2%) | 1238(73.1%) | 571(83.1%) |
| Medium (n, %) | 63(15.5%) | 164(23.4%) | 336(19.9%) | 97(14.1%) |
| High (n, %) | 12(3.0%) | 59(8.4%) | 118(7.0%) | 19(2.8%) |
| **Household income per capita** | |  |  |  | <0.0001 |
| Low (n, %) | 30(7.4%) | 56(8.0%) | 157(9.3%) | 107(15.7%) |
| Medium (n, %) | 149(37.0%) | 198(28.5%) | 574(34.0%) | 247(36.3%) |
| High (n, %) | 224(55.6%) | 441(63.5%) | 954(56.6%) | 326(48.0%) |
| **Total energy intake** (kcal/d) | 2003.3±630.0 | 2074.2±628.3 | 2109.8±601.3 | 2033.0±661.9 | <0.0001 |
| **Current smoker** (n, %) | 121(29.8%) | 178(25.4%) | 455 (26.9%) | 184(26.8%) | 0.4583 |
| **Alcohol drinking** (n, %) | 120(29.6%) | 236(33.6%) | 592(35.0%) | 197(28.7%) | 0.0111 |
| **Physical activity** |  |  |  |  | <0.0001 |
| Low (n, %) | 267(65.7%) | 406(57.8%) | 831(49.1%) | 337(49.1%) |
| Moderate (%) | 42(10.3%) | 92(13.1%) | 222(13.1%) | 90(13.1%) |
| High (n, %) | 97(23.9%) | 204(29.1%) | 639(37.8%) | 260(37.8%) |
| **Medical history** |  |  |  |  |  |
| Diabetes (n, %) | 20(4.9%) | 20 (2.9%) | 53(3.1%) | 30(4.4%) | 0.1397 |
| Hypertension (%) | 83(20.4%) | 78(11.1%) | 192(11.4%) | 109(15.9%) | <0.0001 |
| MI (n, %) | 8(2.0%) | 11(1.6%) | 14(0.8%) | 13(1.9%) | 0.0885 |
| Stroke (n, %) | 11(2.7%) | 7(1.0%) | 20(1.2%) | 18(2.6%) | 0.0108 |
| **Blood pressure** |  |  |  |  |  |
| SBP (mmHg) | 131.7±19.4 | 127.6±17.5 | 124.6±17.2 | 126.9±19.9 | <0.0001 |
| DBP (mmHg) | 84.6±11.4 | 83.3±11.2 | 82.5±10.7 | 82.0±11.7 | 0.0005 |
| **Hs-CRP** (mg/L) | 1.81±1.95 | 1.70±1.84 | 1.55±1.69 | 1.77±1.87 | 0.0202 |
| **TG** (mmol/L) | 1.83±1.56 | 1.76±1.74 | 1.76±1.73 | 1.66±1.46 | 0.3379 |
| **LDL-C** (mmol/L) | 3.25±0.99 | 3.07±1.03 | 3.01±1.05 | 2.96±0.99 | <0.0001 |
| **HDL-C** (mmol/L) | 1.43±0.41 | 1.41±0.39 | 1.43±0.67 | 1.42±0.50 | 0.7149 |
| **UA** (μmol/L) | 295.6±91.8 | 292.5±124.0 | 293.5±102.9 | 286.8±107.0 | 0.3328 |
| **Glucose** (mmol/L) | 5.67±1.72 | 5.49±1.43 | 5.47±1.55 | 5.51±1.62 | 0.0032 |
| **Insulin** (uIU/mL) | 15.04±21.92 | 14.43±18.36 | 14.69±20.65 | 16.67±29.95 | 0.3076 |

**Note:** Data are expressed as the mean ± SD or as number (percentage).

Abbreviations: BMI, body mass index; MI, Myocardial infarction; SBP, systolic blood pressure; DBP, diastolic blood pressure; hs-CRP, high sensitive C-reactive protein; TG, triglycerides; LDL-C, low density lipoprotein cholesterol; HDL-C, high density lipoprotein cholesterol; UA, Uric acid. Glucose: Fasting serum glucose. Insulin: Fasting serum insulin.

a P value represents the significance of difference across sleep duration categories. P values were determined by one-way analysis of variance or Kruskal-Wallis test for continuous variables and Pearson χ2 statistic for categorical variables.
